# Supplementary material for: Motor dysfunction and neurodegeneration in a C9orf72 mouse line expressing poly-PR
Source: PubMed Central journal article supplement (PMC6606620; doi:10.1038/s41467-019-10956-w), 2019-07-02
Supplement: 41467_2019_10956_MOESM1_ESM.pdf [file 41467_2019_10956_MOESM1_ESM.pdf]

## **SUPPLEMENTARY INFORMATION**

**Motor dysfunction and neurodegeneration in a *C9orf72* mouse line  
expressing poly-PR**

**Hao et al**

## Supplementary Figure 1

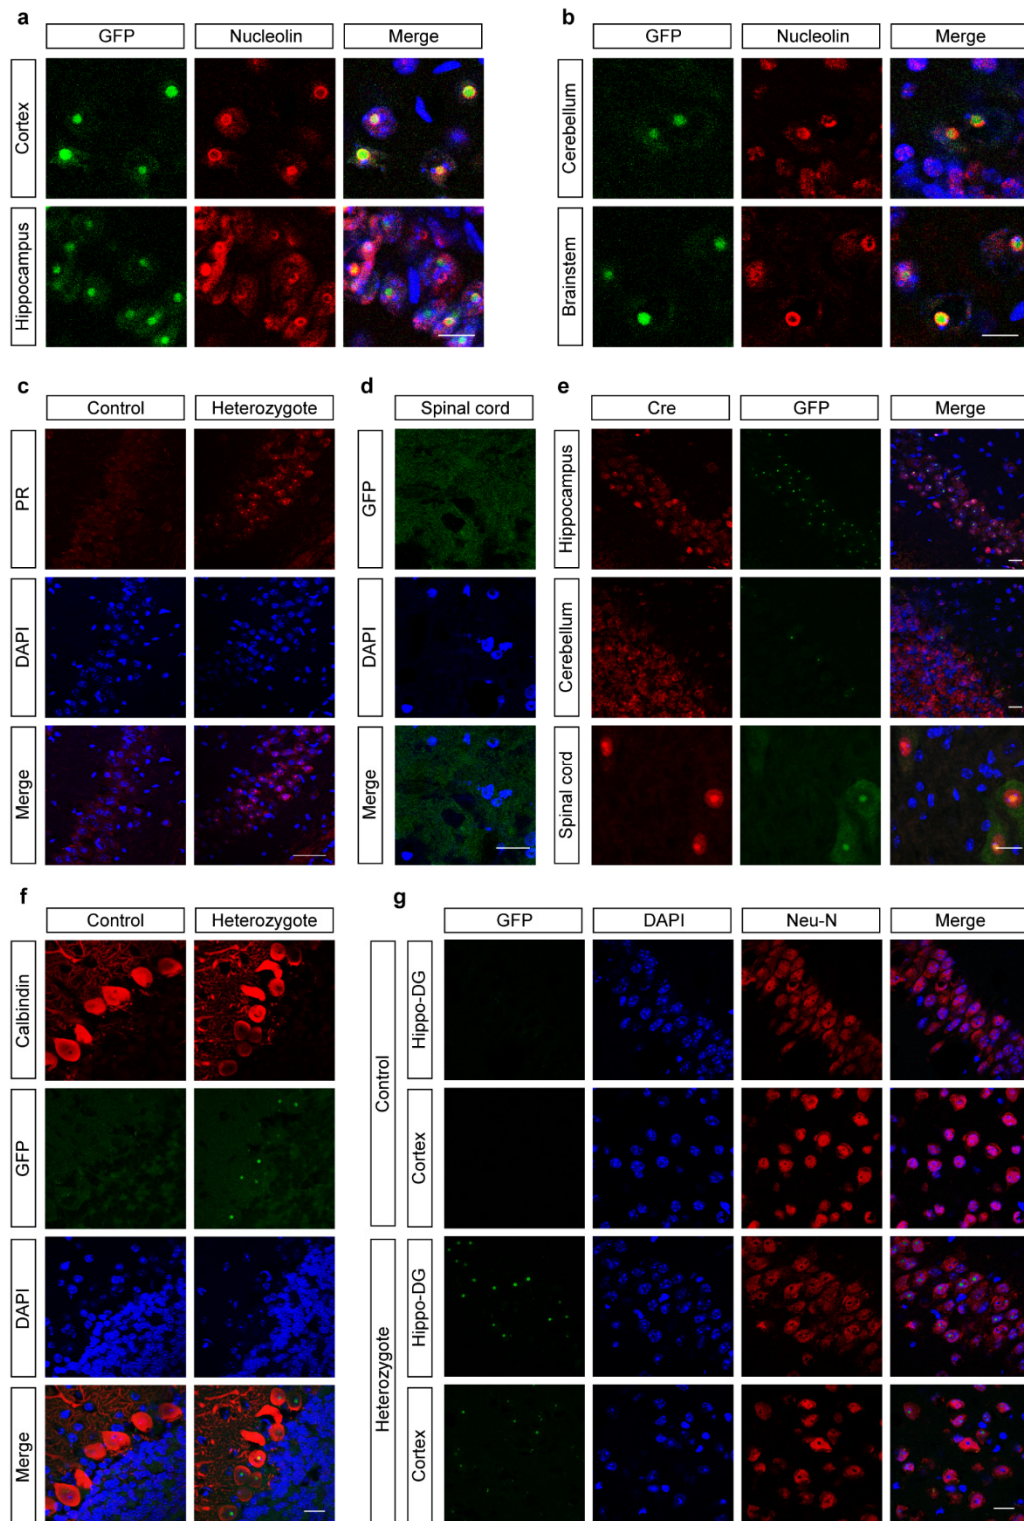

### Supplementary Fig. 1 | Distribution of GFP-PR<sub>28</sub> in brain regions of heterozygous mice.

**a, b** Representative images show co-localization of GFP-PR<sub>28</sub> and nucleolin in cortex, hippocampus, cerebellum and brainstem of 2 months old control and GFP-PR<sub>28</sub> heterozygous mice. Scale bar represents 50  $\mu$ m. **c** Distribution of GFP-PR<sub>28</sub> in hippocampal neurons of 2

months old control and GFP-PR<sub>28</sub> heterozygous mice validated with PR antibody. Scale bar represents 50  $\mu$ m. **d** Representative images showing distribution of GFP staining in lumbar spinal cord of control mice at 2 months of age. Scale bar represents 50  $\mu$ m. **e** Distribution of GFP-PR<sub>28</sub> and Cre recombinase in hippocampus, cerebellum and spinal cord of 2 months old GFP-PR<sub>28</sub> heterozygous mice, Scale bar represents 20  $\mu$ m. **f** Distribution of GFP-PR<sub>28</sub> in calbindin positive Purkinje cells in the cerebellum of 2 months old control and GFP-PR<sub>28</sub> heterozygous mice. Scale bar represents 20  $\mu$ m. **g** Distribution of GFP-PR<sub>28</sub> in Neu-N positive neurons in the hippocampus and motor cortex of 2 months old control and GFP-PR<sub>28</sub> heterozygous mice. Scale bar represents 20  $\mu$ m.

## Supplementary Figure 2

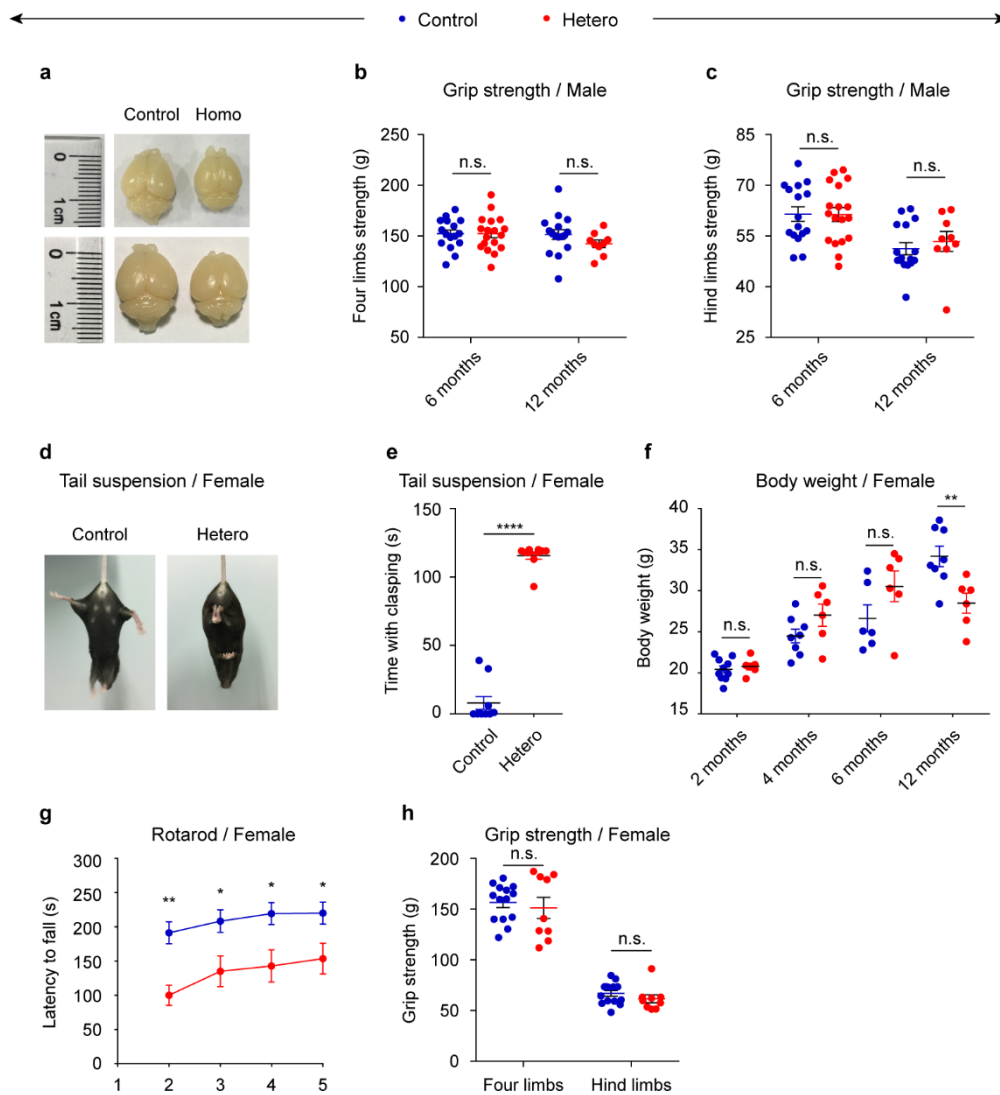

### Supplementary Fig. 2 | GFP-PR<sub>28</sub> transgenic female mice show motor deficits.

**a** Representative images showing brain size of 20 days old control and the homozygous mice.

**b** Grip strength test of four limbs of 6 months old male control and GFP-PR<sub>28</sub> heterozygous mice. Two-way ANOVA, Bonferroni post hoc test; 6 months,  $n = 16, 18$  mice; 12 months,  $n = 16, 9$  mice.

**c** Grip strength test of hind limbs of 6 months old male control and GFP-PR<sub>28</sub> heterozygous mice. Two-way ANOVA, Bonferroni post hoc test; 6 months,  $n = 16, 18$  mice; 12 months,  $n = 16, 9$  mice.

**d** Representative images of female control and GFP-PR<sub>28</sub> heterozygous mice at 2 months of age in tail suspension test.

**e** Quantification of the clasping time of mice in (d) during 2 min test. Mann Whitney test,  $n = 10, 10$  mice.

**f** Body weight of female control and GFP-PR<sub>28</sub> heterozygous mice at 2, 4, 6 and 12 months of age. Two-way ANOVA, Bonferroni post hoc test; 2 months,  $n = 10, 6$  mice; 4 months,  $n = 8, 6$  mice; 6 months,  $n = 6, 6$  mice; 12 months,  $n = 8, 6$  mice.

**g** Latencies to fall from the accelerated rotating beams of female control and GFP-PR<sub>28</sub> heterozygous mice at 6 months of age. Two-way ANOVA, Bonferroni post hoc

test;  $n = 18$ , 13 mice. **h** Grip strength test of four limbs and hind limbs of female control and GFP-PR<sub>28</sub> heterozygous mice at 6 months of age. Two-way ANOVA, Bonferroni post hoc test; four limbs,  $n = 14$ , 9 mice; hind limbs,  $n = 14$ , 9 mice. All data were displayed as mean  $\pm$  s.e.m. \* $P < 0.05$ , \*\* $P < 0.01$ , \*\*\*\* $P < 0.0001$ , n.s., no significant.

### Supplementary Figure 3

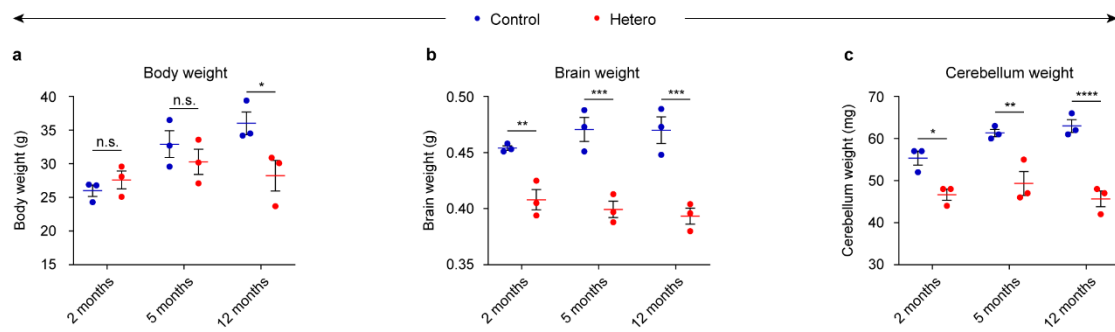

### Supplementary Fig. 3 | The expression of GFP-PR<sub>28</sub> causes brain atrophy.

**a-c** Quantification of body weight (**a**), brain weight (**b**) and cerebellum weight (**c**) of control and GFP-PR<sub>28</sub> heterozygous mice at 2, 5 and 12 months of age.  $n = 3$ , 3 mice. All data were displayed as mean  $\pm$  s.e.m. Two ANOVA, Bonferroni post hoc test; \* $P < 0.05$ , \*\* $P < 0.01$ , \*\*\* $P < 0.001$ , \*\*\*\* $P < 0.0001$ , n.s., no significant.

## Supplementary Figure 4

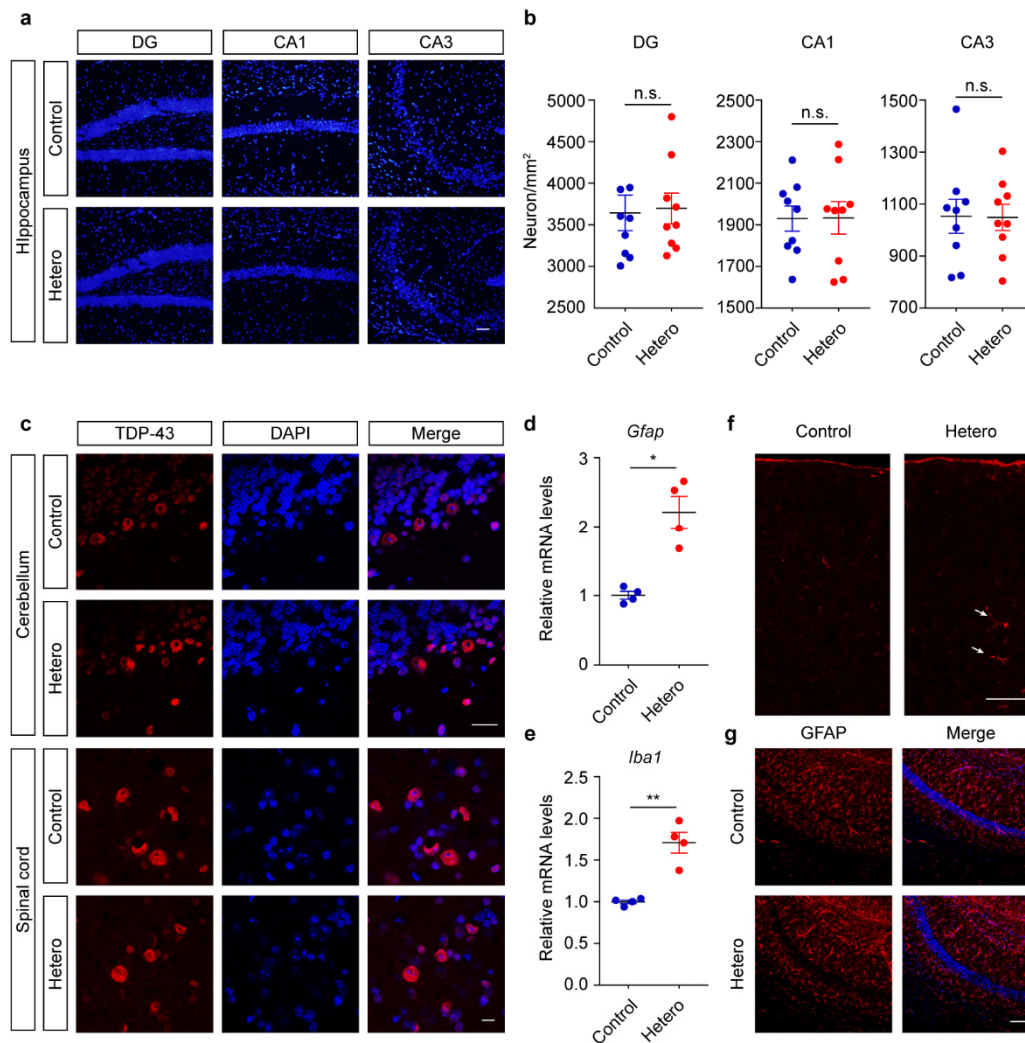

### Supplementary Fig. 4 | GFP-PR<sub>28</sub> heterozygous mice show no hippocampal neuronal deficits.

**a** Representative images showing the numbers of Hoechst positive neurons in the hippocampus of 6 months old control and GFP-PR<sub>28</sub> heterozygous mice. Dentate gyrus (DG), cornu ammonis 1 (CA1), cornu ammonis 3 (CA3). Hoechst (blue). Scale bar represents 100  $\mu$ m. **b** Quantification of cell numbers in different hippocampal regions in (a). Two-tailed *t* test,  $n = 9$ , 9 mice. **c** Representative images showing the localization of TDP-43 in the cerebellum and spinal cord of 12 months old control and GFP-PR<sub>28</sub> heterozygous mice. Scale bar represents 20  $\mu$ m. **d** Relative mRNA levels of *Gfap* in the cerebellum 6 months old control and GFP-PR<sub>28</sub> heterozygous mice determined by quantitative real-time PCR. Two-tailed *t* test,  $n = 4$ , 4 mice. **e** Relative mRNA levels of *Iba1* in the cerebellum 6 months old control and GFP-PR<sub>28</sub> heterozygous mice determined by quantitative real-time PCR. Two-tailed *t* test,  $n = 4$ , 4 mice. **f** Representative images showing the staining of GFAP positive astrocytes in the motor cortex

of 6 months old control and GFP-PR<sub>28</sub> heterozygous mice. Arrows indicate the activation of astrocytes. Scale bar represents 100  $\mu\text{m}$ . **g** Representative images showing the staining of GFAP positive astrocytes in the hippocampus of 6 months old control and GFP-PR<sub>28</sub> heterozygous mice. Scale bar represents 100  $\mu\text{m}$ . All data were displayed as mean  $\pm$  s.e.m. \* $P < 0.05$ , \*\* $P < 0.01$ , n.s., no significant.



## Supplementary Figure 5

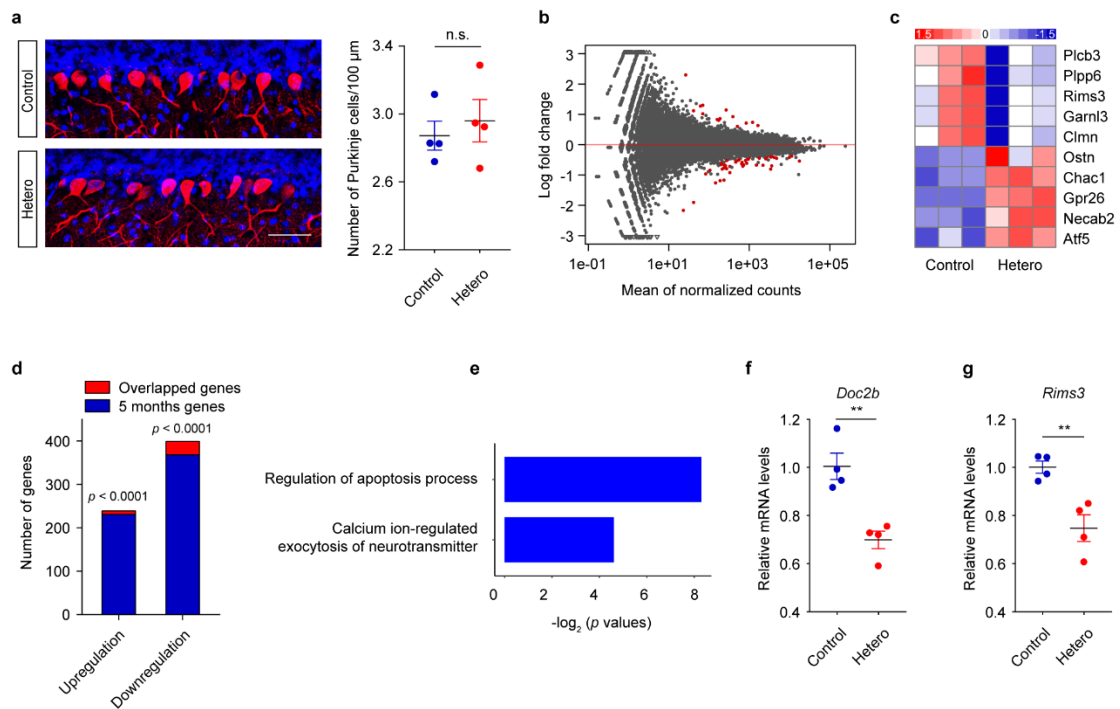

### Supplementary Fig. 5 | Dysregulated synaptic-related genes in the cerebellum of 2 months old mice.

**a** Left, representative images showing the numbers of Purkinje cells in 2 months old control and GFP-PR<sub>28</sub> heterozygous mice. Calbindin (red), Hoechst (blue). Scale bar represents 100  $\mu$ m. Right, quantification of the numbers of calbindin positive Purkinje cells from (Left). Two-tailed *t* test, *n* = 4, 4 mice. **b** MA-plot of differentially expressed genes in the cerebellum of 2 months old control and GFP-PR<sub>28</sub> heterozygous mice. Red blots indicate significant changes, *n* = 3, 3 mice. **c** Hierarchical clustering of top ten differentially expressed genes in the cerebellum of 2 months old control and GFP-PR<sub>28</sub> heterozygous mice. **d** Comparison of differentially expressed genes in the cerebellum of 2 and 5 months old heterozygous mice. 2 months old, 11 upregulated genes, 8 overlapped genes; 31 downregulated genes, 30 overlapped genes. **e** Gene Ontology (GO) biological processes analyses of upregulated and downregulated genes in (b). No significant pathway indicated by upregulated genes of 2 months old heterozygous mice. **f, g** Relative mRNA levels of *Doc2b* and *Rims3* in the cerebellum of 2 months old control and GFP-PR<sub>28</sub> heterozygous mice determined by qRT-PCR. Two-tailed *t* test, *n* = 4, 4 mice. All data were displayed as mean  $\pm$  s.e.m. \*\**P* < 0.01, n.s., no significant.

## Supplementary Figure 6

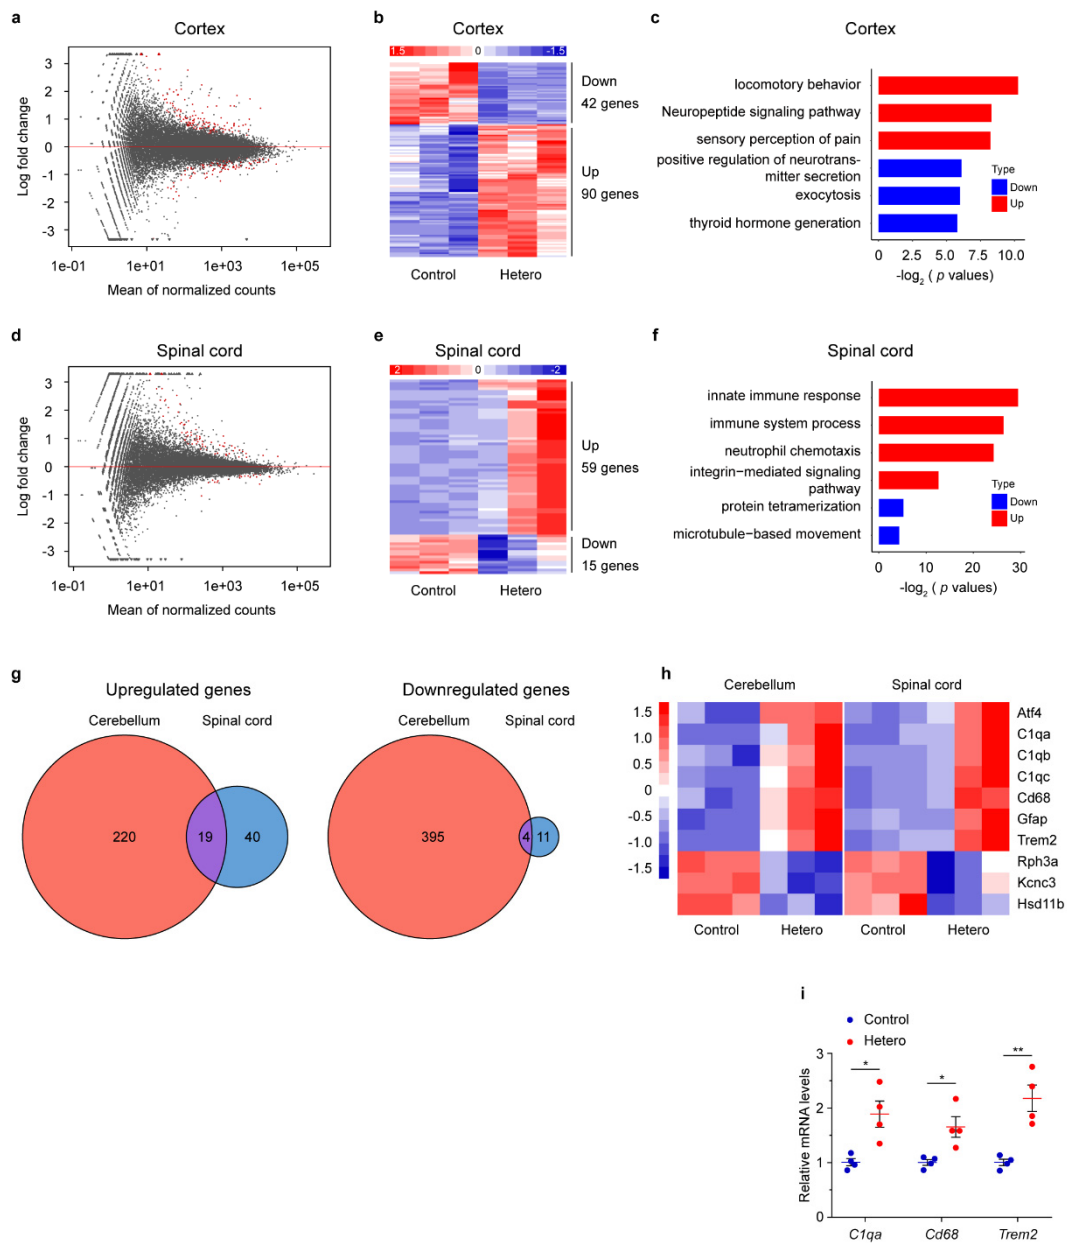

### Supplementary Fig. 6 | RNA-seq analyses in the cortex and lumbar spinal cord of 6 months old mice.

**a** MA-plot of differentially expressed genes in the cortex of 6 months old control and GFP-PR<sub>28</sub> heterozygous mice. Red blots indicate significant changes,  $n = 3$ , 3 mice. **b** Hierarchical clustering of differentially expressed genes in the cortex of 6 months old control and GFP-PR<sub>28</sub> heterozygous mice. **c** Gene Ontology (GO) biological processes analyses of upregulated and downregulated genes in **(b)**. **d** MA-plot of differentially expressed genes in the lumbar spinal cord of 6 months old control and GFP-PR<sub>28</sub> heterozygous mice. Red blots indicate significant changes,  $n = 3$ , 3 mice. **e** Hierarchical clustering of differentially expressed genes in the lumbar spinal cord of 6 months old control and GFP-PR<sub>28</sub> heterozygous mice. **f** Gene Ontology (GO)

biological processes analyses of upregulated and downregulated genes in **(e)**. **g** Comparison of differentially expressed genes in the cerebellum and spinal cord of heterozygous mice. **h** Representative ten genes both dysregulated in the cerebellum and lumbar spinal cord of heterozygous mice. **i** Representative genes dysregulated in **(h)** were determined by qRT-PCR. Two-tailed *t* test, *n* = 4, 4 mice. All data were displayed as mean ± s.e.m. \**P* < 0.05, \*\**P* < 0.01.

**Supplementary Table 1 | Primers used for transgenic mice genotyping.**

| Target   | Sense/Antisense | Sequence                          |
|----------|-----------------|-----------------------------------|
| F1       | Forward         | 5'-AGTCGCTCTGAGTTGTTATCAG-3'      |
| R1       | Reverse         | 5'-TGAGCATGTCTTTAATCTACCTCGATG-3' |
| F2       | Forward         | 5'-GCATCGATACCGTCGACCTC-3'        |
| R2       | Reverse         | 5'-TTTGATAAGGCTGCAGAAGGAGCGG-3'   |
| Thy1-cre | Forward         | 5'-GCGGTCTGGCAGTAAAACTATC-3'      |
| Thy1-cre | Reverse         | 5'-GTGAAACAGCATTGCTGTCACTT-3'     |

**Supplementary Table 2 | Primers used for quantitative real time PCR.**

| Target         | Forward                       | Reverse                       |
|----------------|-------------------------------|-------------------------------|
| <i>Gfp</i>     | 5'-GAAGCGCGATCACATGGT-3'      | 5'-CCATGCCGAGAGTGATCC-3'      |
| <i>Gfap</i>    | 5'-GGAGAGGGACAACCTTTGCAC-3'   | 5'-AGCCTCAGGTTGGTTTCATC-3'    |
| <i>Ibal1</i>   | 5'-GGATTTGCAGGGAGGAAAAG-3'    | 5'-TGGGATCATCGAGGAATTG-3'     |
| <i>β-actin</i> | 5'-GGCTGTATTCCCCTCCATCG-3'    | 5'-CCAGTTGGTAACAATGCCATGT-3'  |
| <i>Camk4</i>   | 5'-GAGAACCTCGTCCCGATTAC-3'    | 5'-ACACAATGGATGTAGCACCCC-3'   |
| <i>Grin2a</i>  | 5'-ACGTGACAGAACGCGAACTT-3'    | 5'-TCAGTGCGGTTTCATCAATAACG-3' |
| <i>Kcnj9</i>   | 5'-ACCGCCTCTTTCTCGTCTCA-3'    | 5'-GATCTCGAAGTCGTCCCTCTC-3'   |
| <i>Rims3</i>   | 5'-GGAATGTAGTAAGGAGTTCCAGC-3' | 5'-CTGGGTCAAGCCGACGATAG-3'    |
| <i>Syt2</i>    | 5'-AGAACCTGGGCAAATTGCAGT-3'   | 5'-CCTAACTCCTGGTATGGCACC-3'   |
| <i>Unc13a</i>  | 5'-GCTGTGCGTGGGAGTCAAA-3'     | 5'-CAGCTATGGTAGTGCTCTTCAC-3'  |
| <i>Pcp2</i>    | 5'-ACAGTTAATTCCCTGCCTGG-3'    | 5'-CTCAAGGAGCTTGTGTCTGG-3'    |
| <i>Doc2b</i>   | 5'-CGACGGCTACGAGTCAGAC-3'     | 5'-TTCAGGGTGTCCGAAGAGTT-3'    |
| <i>C1qa</i>    | 5'-AAAGGCAATCCAGGCAATATCA-3'  | 5'-TGGTCTGGTATGGACTCTCC-3'    |
| <i>Cd68</i>    | 5'-TGTCTGATCTTGCTAGGACCG-3'   | 5'-GAGAGTAACGGCCTTTTTGTGA-3'  |
| <i>Trem2</i>   | 5'-CTGGAACCGTCACCATCACTC-3'   | 5'-CGAAACTCGATGACTCCTCGG-3'   |
