# Supplementary material for: Motor dysfunction and neurodegeneration in a C9orf72 mouse line expressing poly-PR
Source: PubMed Central journal article supplement (PMC6606620; doi:10.1038/s41467-019-10956-w), 2019-07-02
Supplement: 41467_2019_10956_MOESM3_ESM.pdf [file 41467_2019_10956_MOESM3_ESM.pdf]

## **Description of Additional Supplementary Files**

File Name: Supplementary Data 1

Description: Differentially expressed genes of the cerebellum at 5 months old.

File Name: Supplementary Data 2

Description: Differentially expressed genes of the cerebellum at 2 months old.

File Name: Supplementary Data 3

Description: Differentially expressed genes of the cortex at 6 months old.

File Name: Supplementary Data 4

Description: Differentially expressed genes of the spinal cord at 6 months old.

File Name: Supplementary Movie 1

Description: Movie of the 6 months old control mice walking along the edges of cage.

File Name: Supplementary Movie 2

Description: Movie of the 6 months old heterozygous mice walking along the edges of cage.
